# Supplementary material for: Exploration of the Relationship Between Household Food Insecurity and Diabetes in Canada
Source: Oxford University Press journal article supplement (doi:10.2337/dc09-0823), 2009-08-31
Supplement: dc090823-sup-hfi_and_diabetes_-_online_appendices_-_r.doc [file dc090823-sup-hfi_and_diabetes_-_online_appendices_-_r.doc]

**Appendix A: The** **Canadian Community Health Survey, Cycle 3.1 (2005)**

Documentation for the Canadian Community Health Survey, Cycle 3.1 (2005) can be found at the following web address:

<http://prod.library.utoronto.ca:8090/datalib/codebooks/cstdli/cchs/cycle3_1/English/documentation_e.htm>

By clicking on ‘documentation’, you can access the following documents:

- Public Use Microdata File (PUMF) User Guide: provides detailed information on the survey, its methodology, and data usage.
- Data Dictionary: explains the concepts, universes, categories, and frequencies (counts) for each variable.
- Derived Variables and Grouped Variables: provides detailed specifications for how aggregate variables are derived from simpler variables.
- Questionnaire: the comprehensive questionnaire used in the CCHS 3.1 survey.

It should be noted that the User Guide, Data Dictionary, and Derived Variables and Grouped Variables documentation describe variables that are found in the Public Use Microdata File. Many of these variables are aggregates of the variables in the Master File. The data presented in this paper is based on the CCHS 3.1 Master File which the authors accessed through the Toronto Research Data Centre. However, documentation specific to the Master File is not available to the public.

**For more information relevant to the ‘Diabetes Care Module’, please refer to:**

Sanmartin C, Gilmore J. Diabetes-prevalence and care practices. *Health Rep* 2008 September;19(3):59-63.

Ng E, Dasgupta K, Johnson JA. An algorithm to differentiate diabetic respondents in the Canadian Community Health Survey. *Health Rep* 2008 March;19(1):71-9.

**Appendix B: Release Guidelines for CCHS Data**

Statistics Canada provides researchers with guidelines to help determine whether or not certain data should be released, dependent on the magnitude of the coefficient of variation (CV) associated with each estimate. The guidelines are as follow:

- An estimate is considered **acceptable** for general unrestricted release if the CV falls between 0.0 and 16.5 (inclusive).
- An estimate with a CV between 16.6 and 33.3 (inclusive) is considered of **marginal** quality and, although it can be considered for general unrestricted release, it should be accompanied by a warning to caution users of the high sampling variability associated with the estimate.
- An estimate with a CV over 33.3 is considered to be of **unacceptable** quality. The recommendation of Statistics Canada is not to release (i.e. publish) these data. Conclusions based on data of this quality would be unreliable and most likely invalid.

In keeping with these guidelines, the authors have refrained from including any results with CV values over 33.3%.

**Appendix C: Descriptions of variables included in the analysis**

| **Sociodemographic Variables** |
| --- |
| The ‘**adjusted income ratio**’ provides a relative measure of a respondent’s household income to the household incomes of all other respondents. It is based on the adjusted ratio of a respondent’s total household income, to the low income cut-off that corresponds to their household and community size. The variable represents a distribution of Canadians in deciles. For this paper, we combined deciles 3 through 10. This variable was not calculated for respondents residing in the territories (Northwest Territories, Nunavut, and Yukon). |
| The ‘**main source of household income**’ was grouped into four categories: salary/wages (including income from self-employment), social assistance (including Welfare), pension/benefits, and other (including dividends and interest, child tax benefit, child support, alimony, other (e.g. rental income, scholarships)). |
| The question used to determine ‘**employment status**’ over the past 12 months was asked only of respondents between the ages of 15 and 75. Respondents were asked ‘Have you worked at a job or business at anytime in the past 12 months?’ There is no variable in either the common survey content or the optional modules of the CCHS 3.1 used for this research that identifies retired individuals. There is a variable in one of the sub-modules of the CCHS 3.1 that identifies retired individuals, but the present analysis could not be carried out using this sub-module. |
| ‘**Household education level**’ indicates the highest level of education acquired by any member of the household (less than high school, high school and some post-high school education, and post-high school graduate). |
| ‘**First Nations status**’ included those who reported being North American Indian, Métis, Inuit, or some combination thereof. |
| Respondents who reported having been diagnosed with diabetes were asked ‘**at what age they had been diagnosed**’. This was provided as a continuous variable in CCHS 3.1, which we grouped into two categories: 39 years and under, and 40 year and above. The questions pertaining to whether or not a respondent ‘takes pills or insulin to control their blood sugar’ were asked of those who indicated having been diagnosed with diabetes, excluding females aged 15 years and older who were diagnosed when pregnant. |
| The questions pertaining to ‘**self-perceived unmet healthcare needs**’ and ‘**having been an overnight patient**’ referred to the 12-month period prior to the interview. The ‘mean length of overnight stay’ (in a hospital, nursing home, or convalescent home) was calculated from responses given by those that had reported having stayed overnight in one of these facilities. |
| Questions pertaining to ‘**heart disease**’, ‘**high blood pressure**’, ‘**glaucoma**’, ‘**suffers from the effects of a stroke**’ and ‘**mood disorder**’ all referred to having been diagnosed with these conditions by a health professional. |
| ‘**Fruit and vegetable consumption**’ was grouped into 2 categories: less than 5 times/servings per day, and five or more times/servings per day. It is important to note that this survey asks about the number of times a person consumes, not the amount consumed. |
| A ‘**current smoker**’was defined as one who smokes daily or occasionally at present, regardless of past smoking status. A ‘**former smoker**’ is someone who does not smoke at present but has done so in the past. |
| The ‘**physical activity index**’variable was a derived variable. Respondents were categorized as ‘active’, ‘moderate’, or ‘inactive’, based on information collected about the frequency and duration of various activities engaged in during leisure time over the past 3 months. For this paper, the ‘active’ and ‘moderate’ categories have been combined. Respondents were asked about the following activities: walking for exercise, gardening or yard work, swimming, bicycling, popular or social dance, home exercises, ice hockey, ice skating, in-line skating or rollerblading, jogging or running, golfing, exercise class or aerobics, downhill skiing or snowboarding, bowling, baseball or softball, tennis, weight-training, fishing, volleyball, basketball, soccer, and any additional physical activities not mentioned by the interviewer. The metabolic energy cost associated with each activity (MET value) was used to calculate an energy expenditure value for each respondent. This was expressed in kilocalories per kilogram of body weight per day (kcal/kg/day). Inactive was defined as 0 to 1.46 kcal/kg/day, moderately active as 1.5 to 2.99 kcal/kg/day, and active as 3.0 or more kcal/kg/day. The ‘physical activity index’ follows the same criteria used to categorize individuals in the Ontario Health Survey (OHS) and in the Campbell’s Survey on Well Being. Internet site: Campbell Survey on Well-Being in Canada: [www.cflri.ca/cflri/pa/surveys/88survey.html](http://www.cflri.ca/cflri/pa/surveys/88survey.html) |
| ‘**Body mass index**’ (BMI) was based on self-reported data collected from all respondents, excluding pregnant females. For those aged 18 years and over, the ‘underweight’ and ‘normal’ categories were combined to create ‘neither overweight nor obese’, representing BMI values of less than 25 kg/m2. ‘Overweight’ was defined as a BMI of 25 to less than 30. The three categories representing classes I to III of obesity were collapsed into one ‘obese’ category, representing BMI values of 30 or more. Youths aged 12 to 17 years, excluding pregnant females, were classified into the same three categories according to the Cole system (1). |
| ‘**Average daily alcohol consumption**’ was grouped into two categories: ‘never’, or ‘one or more drinks per day’. |
| Respondents were asked to rate their ‘**satisfaction with life in general**’ on a 5-point scale ranging from ‘very dissatisfied’ to ‘very satisfied’. We combined ‘very satisfied’ and ‘satisfied’ to create the ‘positive’ category and ‘very dissatisfied’ and ‘dissatisfied’ to create the ‘negative’ category. |
| Respondents were asked to rate both their ‘**self-perceived health**’ and ‘**self-perceived mental health**’ on a 5-point scale ranging from ‘poor’ to ‘excellent’. For ‘self-perceived health’, we combined the ‘excellent’ and ‘very good’ categories and the ‘poor’ and ‘fair’ categories. For ‘self-perceived mental health’ we combined the ‘fair’ and ‘poor’ categories. |
| Respondents aged 15 years and older were asked to rate their ‘**self-perceived stress**’ on a 5-point scale ranging from ‘not at all stressful’ to ‘extremely stressful’. We combined the ‘not at all stressful’ and ‘not very stressful’ categories and the ‘quite a bit stressful’ and ‘extremely stressful’ categories. |
| **Diabetes Care Variables:** For the purpose of this study, the following variables were only examined among those people that resided in Ontario, where both the ‘food security’ and ‘diabetes care’ modules were included in the survey. Females aged 15 years and older who were diagnosed with diabetes when pregnant were excluded. |
| **Tested for HbA1C** (and number of times):  In the past 12 months, has a health care professional tested you for haemoglobin “A-one-C”? How many times? |
| **Urine tested for protein**:  In the past 12 months, has a health care professional tested your urine for protein (i.e., Microalbumin)? |
| **Eye exam (and last time)**:  Have you ever had an eye exam where the pupils of your eyes were dilated? (This procedure would have made you temporarily sensitive to light). When was the last time? |
| **Feet checked by health professional (and number of times)**:  In the past 12 months, has a health care professional checked your feet for any sores or irritations? How many times? |
| **Number of times feet checked per day by self**:  How often do you usually have your feet checked for any sores or irritations by yourself or by a family member or friend? |
| **Number of times glucose checked per day by self**:  How often do you usually have your blood checked for glucose or sugar by yourself or by a family member or friend? |
| **ASA**:  In the past month, did you take aspirin or other ASA (acetylsalicylic acid) medication every day or every second day? |
| **Cholesterol medication**:  In the past month, did you take prescription medications such as Lipitor or Zocor to control your blood cholesterol levels? |

Reference List

1. Cole T.J., Bellizzi M.C., Flegal K.M., Dietz W.H.: Establishing a standard definition for child overweight and obesity worldwide: international survey. *Br Med J* 320:1240-1243, 2000
